# Supplementary material for: Early psychosis for the non-specialist doctor
Source: HighWire-hosted journal article supplement (doi:10.1136/bmj.j4578), 2017-11-08

The term psychosis embraces a constellation of symptoms characterized by “positive” symptoms, such as hallucinations or delusions. Less obvious “negative” symptoms include decreased enjoyment and motivation

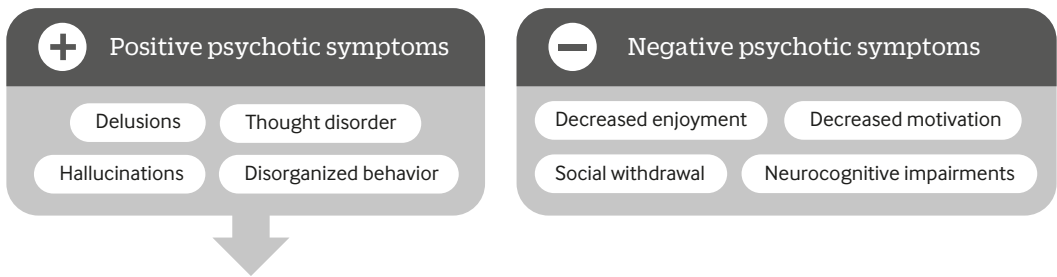

## Differential diagnosis for positive symptoms

Positive psychotic symptoms have a wide differential, and can manifest as a result of other disorders, deficiencies, and infections

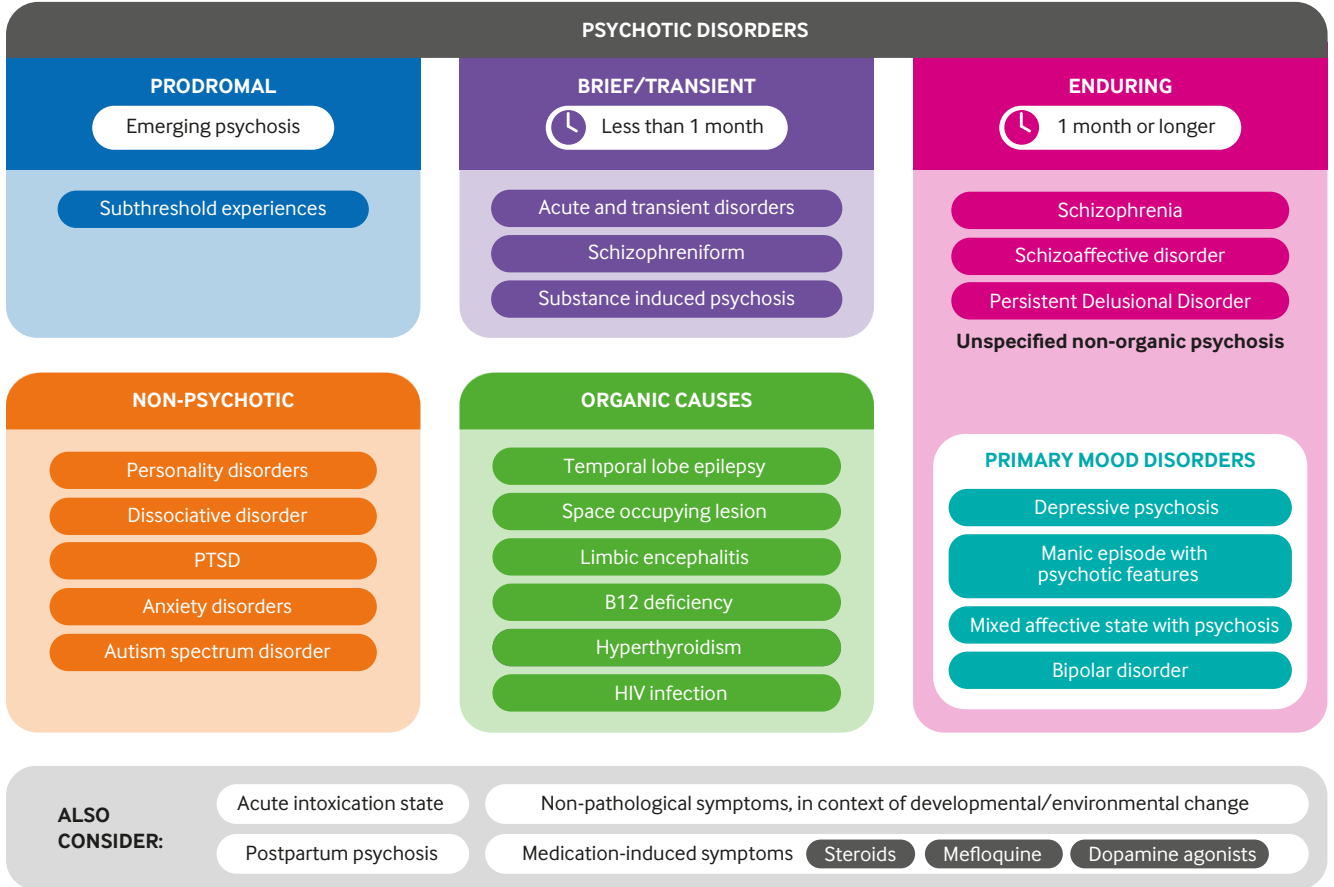

## Management of psychotic disorders

Early referral to specialist services is beneficial. However, longer term cases may involve management in primary care. A General Practitioner (GP) may support four to eight patients with psychotic disorder and see one new presentation each year

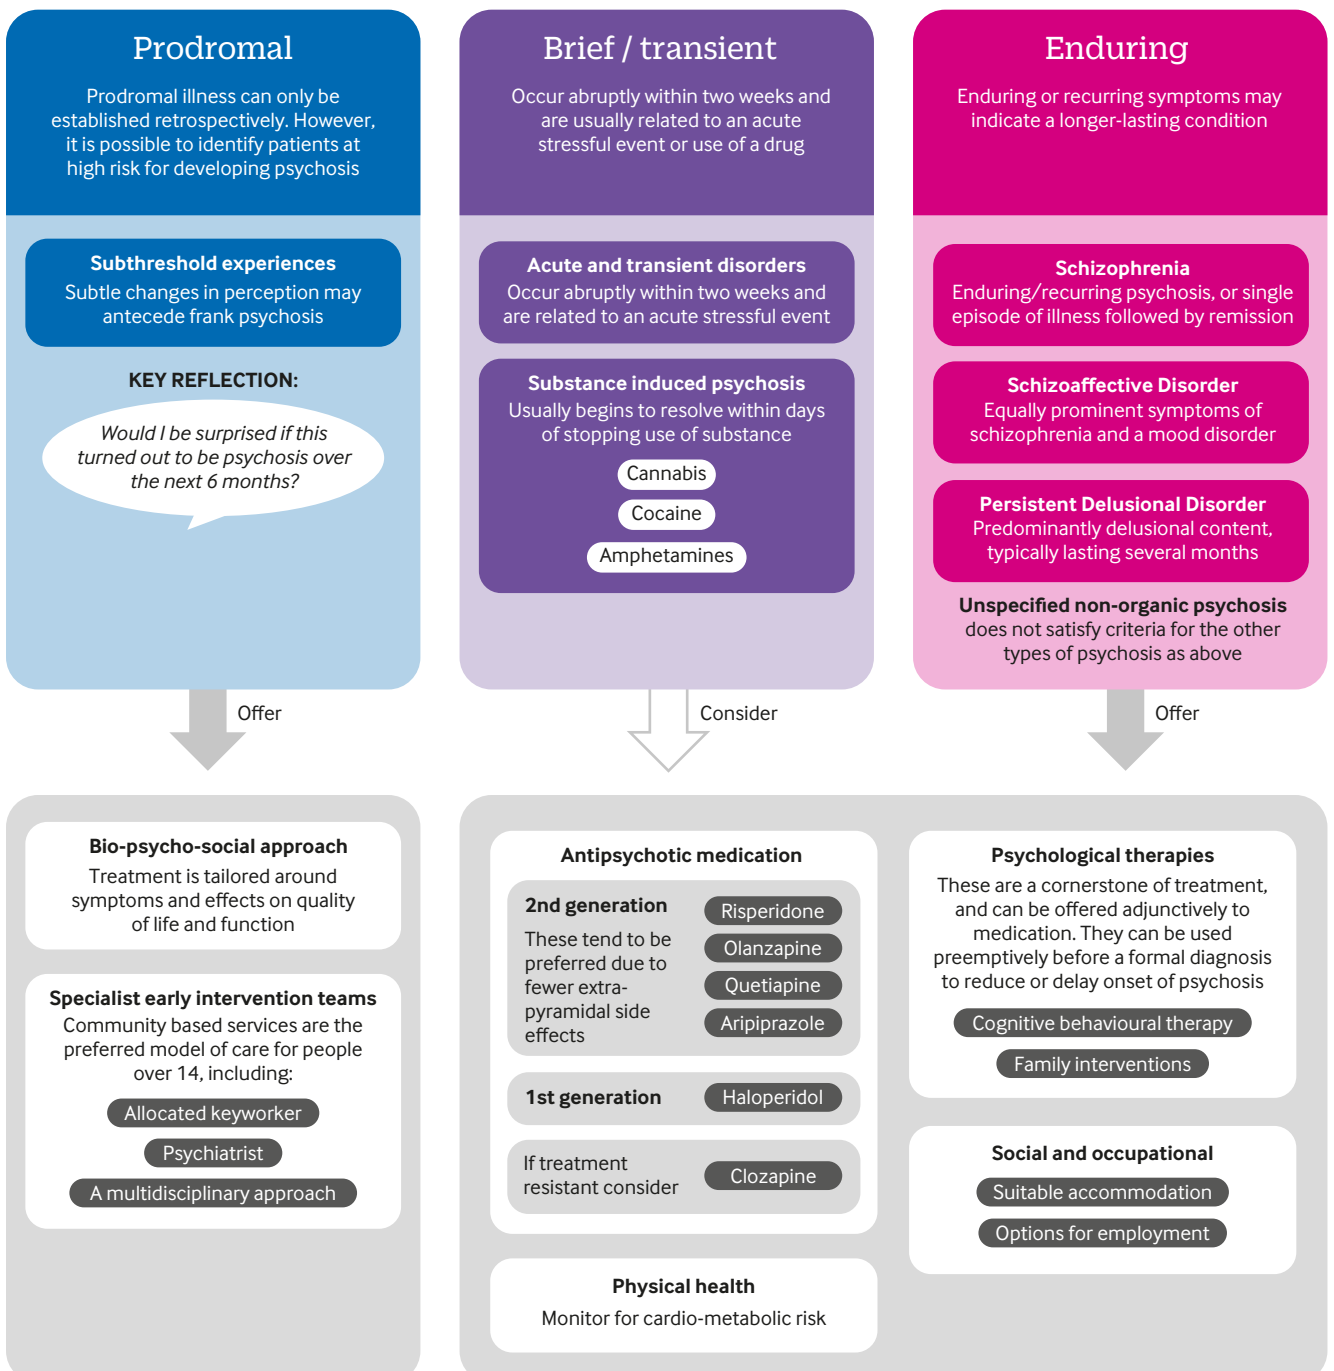

Supplement: psychosis_v28.pdf [file psychosis_v28.pdf]
